# Supplementary material for: Spdef deletion rescues the crypt cell proliferation defect in conditional Gata6 null mouse small intestine
Source: PubMed Central journal article supplement (PMC3917371; doi:10.1186/1471-2199-15-3), 2014-01-28
Supplement: 1471-2199-15-3-S1.pdf [file 1471-2199-15-3-S1.pdf]

## A p53 network: UP

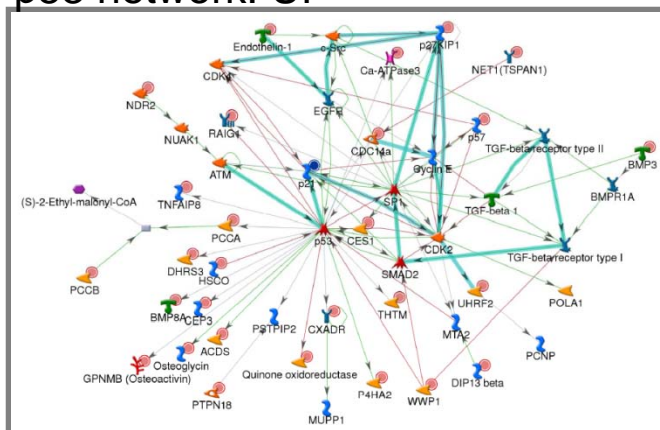

## B c-MYC network: DOWN

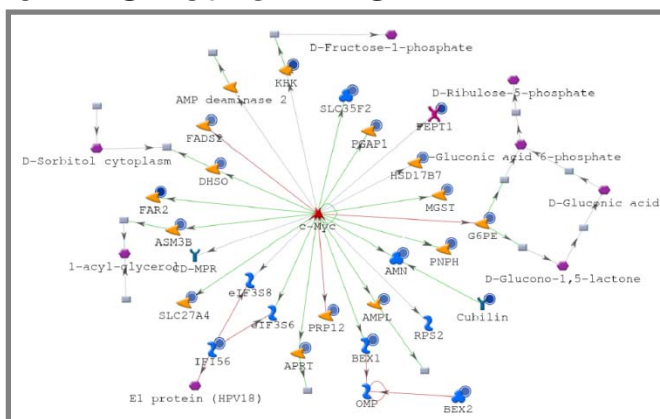

## C Legend

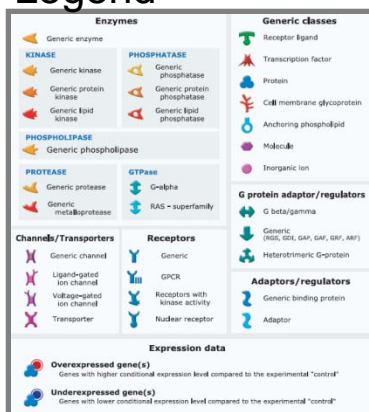

Fig. S1. Intestinal *Gata6* deletion alters gene networks controlling cell proliferation in the mature ileum. Network analyses on microarray data of *Ctl* and *Gata6ΔIE* ileum (n=3 in each group) revealed (A) an increase in targets of the tumor suppressor gene p53, and (B) a decrease in targets of the proto-oncogene c-MYC. (C) Legend defining symbols used in the networks. Arrows indicate the direction of the interaction. Red circles = up-regulated transcripts; Blue circles = down-regulated transcripts. Differentially expressed transcripts were determined at the 5% FDR level using Significance Analysis of Microarrays (SAM) and interaction networks were developed from the differentially expressed transcripts using Metacore.

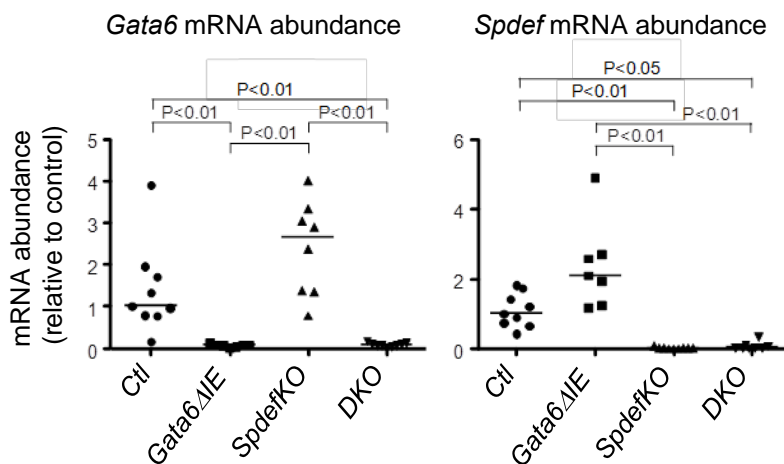

Fig. S2. *Gata6* and *Spdef* mRNA abundance in ileum in each group of mice. *Gata6*ΔIE and *DKO* mice had significantly lower *Gata6* mRNA abundances than *Ctl* and *Spdef*KO mice. *Spdef*KO and *DKO* mice had significantly lower *Spdef* mRNA abundances than *Ctl* and *Gata6*ΔIE mice.

## A qRT-PCR primers

|                   |            |                                 |
|-------------------|------------|---------------------------------|
| <i>hGata6</i> :   | Sense:     | 5' -GACTTGCTCTGGTAATAG-3'       |
|                   | Antisense: | 5' -CTGTAGGTTGTGTTGTGG-3'       |
| <i>hSpdef</i> :   | Sense:     | 5' -AACATCACCGCAGATCCC-3'       |
|                   | Antisense: | 5' -CGGTATTGGTGCTCTGTC-3'       |
| <i>hGapdh</i> :   | Sense:     | 5' -AAGTATGACAACAGCCTC-3'       |
|                   | Antisense: | 5' -ATGAGTCCTTCCACGATA-3'       |
| <i>mGata6</i> :   | Sense:     | 5' -CAGCAAGCTGTTGTGGTC-3'       |
|                   | Antisense: | 5' -GTCTGGTACATTTCTCCG-3'       |
| <i>mSpdef</i> :   | Sense:     | 5' -CAACAAGGAGAAAGGCATCTT-3'    |
|                   | Antisense: | 5' -GCGGCTTAGTTTATCATAGTTCA-3'  |
| <i>mChga</i> :    | Sense:     | 5' -CACAGCCACCAATACC-3'         |
|                   | Antisense: | 5' -TCTTCCTCCTCCTCTTC-3'        |
| <i>mNeurog3</i> : | Sense:     | 5' -CTCAGCAAACAGCGAAGAAG-3'     |
|                   | Antisense: | 5' -GGGAAGGTGGGCAGGAC-3'        |
| <i>mLyz</i> :     | Sense:     | 5' -ACTCCTCCTTGCTTTCTGTC-3'     |
|                   | Antisense: | 5' -GTCGGTGCTTCGGTCTC-3'        |
| <i>mMuc2</i> :    | Sense:     | 5' -AACTACCACTGTGATGCCAATG-3'   |
|                   | Antisense: | 5' -ACAATGTTGATGCCAGACTCG-3'    |
| <i>mApoa1</i> :   | Sense:     | 5' -GGACTTCTGGGATAACCT-3'       |
|                   | Antisense: | 5' -GCACCTTCTGTTTCACTT-3'       |
| <i>mCar1</i> :    | Sense:     | 5' -AACAGAATTATGTCAGTGCTAA-3'   |
|                   | Antisense: | 5' -AGAGAATGAATCACTTAGTTGTAA-3' |
| <i>mGapdh</i> :   | Sense:     | 5' -GCCTTCCGTGTTCCCTACCC-3'     |
|                   | Antisense: | 5' -TGCCTGCTTCACCACCTTC-3'      |

## B ChIP primers

*hSpdef* (-40 kb), region 1:

Sense: 5' -AAAGGTCTTCCTCCAAAATG-3'

Antisense: 5' -CAAAGCAGTAAGACTTGGAG-3'

*hSpdef* (-40 kb), region 2:

Sense: 5' -CAGTTTGAATCCATCCTCC-3'

Antisense: 5' -CCTATCTTCAAAGCATTACTATCT-3'

*hSpdef* (-40 kb), region 3:

Sense: 5' -CTATGGATTGGTCACATCTAC-3'

Antisense: 5' -GTTTGAGGGTCTTGAAGTT-3'

*Amy1* TSS:

Sense: 5' -GGAAAATAAAGGGTTGGAGC-3'

Antisense: 5' -AGTGAATCATGTCAGTATAACAA-3'

## C Genotype primers

*Gata6*:        Sense:        5' -GTGGTTGTAAGGCGGTTTGT-3'  
                  Antisense:    5' -ACGCGAGCTCCAGAAAAAGT-3'

*Cre*:            Sense:        5' -CGTATAGCCGAAATTGCCAG -3'  
                  Antisense:    5' -CAAAACAGGTAGTTATTCGG-3'

*Spdef*:         WTSense:     5' -CCCACCTCCTATGTCAGCCATGGC-3'  
                  Antisense:    5' -CAATCCTGTACCATATCTGGCATGG-3'  
                  KO Sense:     5' -GCATCGCATTGTCTGAGTAGGTGTCA-3'

Fig. S3. Primers used for: (A) qRT-PCR, (B) ChIP assays, and (C) genotyping.

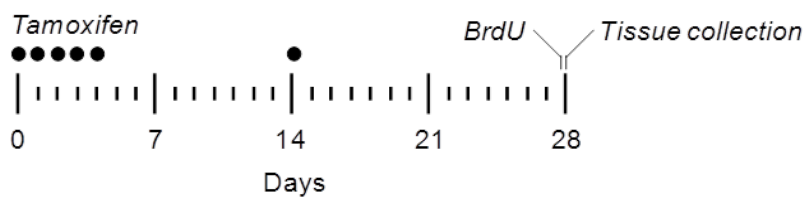

Fig. S4. Timeline for study. Mice 4 wks of age were given Tamoxifen as indicated (*black circle*) beginning on Day 0, and an injection of BrdU 2 hr before tissue collection at Day 28.
